# Supplementary material for: Effects of Mindfulness in the School Context: A Quasi-Experimental Study in Primary School
Source: Research Square preprint supplement (doi:10.21203/rs.3.rs-7366447/v1), 2025-10-01
Supplement: Supplementary file 1 [file 63e90fea105ad446aed5ea89.docx]

# **Supplementary Tables**

# Tab. 1 (sup)

| Instrument | Function Measured | Format | Source |
| --- | --- | --- | --- |
| Numerical Stroop – BIA | Inhibitory control, cognitive flexibility, sustained attention | Paper–pencil task | Marzocchi, Re, & Cornoldi (2010) |
| Child and Adolescent Mindfulness Measure (CAMM) | Level of dispositional mindfulness | Self-report questionnaire, 10 items | Greco, D'Alessandro, Paciello, & Di Giunta (2017) |
| Emotional Regulation Checklist – ERC | Emotional regulation ability; Emotional lability/negativity | Teacher-report questionnaire | Greco, Paciello, & Di Giunta (2015) |
| WISC-IV – Digit Span (forward and backward) | Working memory – maintenance and manipulation of information | Individually administered task | Wechsler (2003) |
| WISC-IV – Letter–Number Sequencing | Complex working memory, sequential ordering | Individually administered task | Wechsler (2003) |

Tab 2 (sup)

| Variable | Analysis | Statistics | p | Effect size | Effect Direction |
| --- | --- | --- | --- | --- | --- |
| DSB | t-test delta scores | t(40) = -4.50 | < .001 | d = -1.39 | Mindfulness > Control |
| LNS | t-test delta scores | t(40) = -3.14 | .003 | d = -0.97 | Mindfulness > Control |
| ERC – Reactivity | t-test delta scores | t(40) = -2.60 | .013 | d = -0.80 | Mindfulness > Control |
| ERC – L/N | t-test delta scores | t(40) = 2.60 | .013 | d = -0.80 | Mindfulness > Control |
| DSB | ANOVA 2x2 | F(1,40) = 20.30 | < .001 | η²p = .336 | Mindfulness > Control |
| LNS | ANOVA 2x2 | F(1,40) = 9.84 | .003 | η²p = .197 | Mindfulness > Control |
| ERC – Reactivity | ANOVA 2x2 | F(1,40) = 6.75 | .013 | η²p = .144 | Mindfulness > Control |
| ERC – L/N | ANOVA 2x2 | F(1,40) = 6.77 | .013 | η²p = .145 | Mindfulness > Control |
